# Supplementary material for: Sleep-like unsupervised replay reduces catastrophic forgetting in artificial neural networks
Source: PubMed Central journal article supplement (PMC9755223; doi:10.1038/s41467-022-34938-7), 2022-12-15
Supplement: 41467_2022_34938_MOESM1_ESM.pdf [file 41467_2022_34938_MOESM1_ESM.pdf]

# Supplementary Information for "Sleep-like Unsupervised Replay Reduces Catastrophic Forgetting in Artificial Neural Networks".

Timothy Tadros, Giri P. Krishnan, Ramyaa Ramyaa, Maxim Bazhenov

## 1. Analysis of similarity of network weights in continual learning scenario

To support our statement that the information about previous tasks is not completely erased after new training, here we examine the cosine similarity between network parameters before and after new task training for two classification tasks trained sequentially ( $T_1$  and  $T_2$ ). We show that the cosine similarity or the dot product of normalized weight vectors that correspond to the network weights before and after training on new task is positive. We first provide lemmas on vector dot products, which then are applied for analysis of toy model.

**Lemmas.** The following properties of vector dot products will be used in subsequent sections.

**Lemma 1.** Let  $\vec{U}$  and  $\vec{J}$  be two vectors. The maximum value of  $\sum_i U_i * J_i = \|\vec{U}\| * \|\vec{J}\|$ .

*Proof.* Since  $\sum_i U_i * J_i \vec{U} \cdot \vec{J} = \|\vec{U}\| * \|\vec{J}\| \cos(\theta)$  where  $\theta$  is the angle between  $\vec{U}$  and  $\vec{J}$ , the maximum value of  $\sum_i U_i * J_i = \|\vec{U}\| * \|\vec{J}\|$ .  $\square$

**Lemma 2.** Let  $\vec{U}$  and  $\vec{J}$  be vectors of length  $n$  such that  $\vec{U} \cdot \vec{J} > 0$ . Let  $\vec{V}$  be  $\vec{U} - \alpha \vec{J}$  for some  $\alpha$  such that  $\vec{V} \cdot \vec{J} = 0$ . Then  $\vec{U} \cdot \vec{V} \geq 0$ , with  $\vec{U} \cdot \vec{V} = 0$  only when the angle between  $\vec{U}$  and  $\vec{J}$  is 0.

*Proof.*  $\vec{U} \cdot \vec{V} = \sum_i U_i * (U_i - \alpha * J_i)$   
 $= (\|\vec{U}\|)^2 - \alpha \sum_i U_i * J_i$ .

Minimizing this expression involves maximizing  $\alpha$  and  $\sum_i U_i * J_i$ . By lemma 1, the maximum value of  $\sum_i U_i * J_i$  is  $\|\vec{U}\| * \|\vec{J}\|$ .

To compute the maximum value of  $\alpha$ : We know  $\vec{V} \cdot \vec{J} = 0$ , i.e.,  $(\vec{U} - \alpha \vec{J}) \cdot \vec{J} = 0$ . So,  $\sum_i U_i * J_i - \alpha \sum_i J_i^2 = 0$  So,  $\alpha = \vec{U} \cdot \vec{J} / \sum_i J_i^2$ . Since  $\vec{U} \cdot \vec{J} = \|\vec{U}\| * \|\vec{J}\| * \cos(\theta)$  where  $\theta$  is the angle between  $\vec{U}$  and  $\vec{J}$ , the maximum value of  $\alpha$  is  $\|\vec{U}\| * \|\vec{J}\| / \sum_i J_i^2$ , i.e.,  $\|\vec{U}\| / \|\vec{J}\|$ .

So, the minimum value of  $\vec{U} \cdot \vec{V}$  is  $(\|\vec{U}\|)^2 - \|\vec{U}\| / \|\vec{J}\| * \|\vec{U}\| * \|\vec{J}\|$ , i.e., 0. Since the maximum values of  $\alpha$  and  $\sum_i U_i * J_i$  occurs when the angle between  $\vec{U}$  and  $\vec{J}$  is 0, any other situations makes  $\vec{U} \cdot \vec{V}$  positive.  $\square$

**Toy Model Problem Setting.** The data set has  $f$  features and four possible labels -  $L_1, L_2, L_3$  and  $L_4$ . Task 1 ( $T_1$ ) consists of separating instances of  $L_1$  and  $L_2$  (tested only on these instances).  $T_2$  consists of separating instances of  $L_3$  and  $L_4$  (tested only on these instances). A neural network  $N$  can be trained to classify the data:  $N$  has  $f$  inputs and 4 output neurons  $O_1, O_2, O_3$  and  $O_4$ , each one intended to indicate a unique label, i.e.,  $O_i$  is intended to be true iff the input instance has label  $i$ . The training of  $N$  happens in 2 phases. In phase 1,  $N$  is trained to perform  $T_1$ , i.e., the training set consists only of instances labeled 1 or 2. (So, neurons  $O_3$  and  $O_4$  are trained to output only 0's. In phase 2  $N$  is trained to perform  $T_2$ , i.e., the training set consists only of instances labeled 3 or 4. (neurons  $O_3$  or  $O_4$  are trained to output 1's for the correct inputs, and  $O_1$  and  $O_2$  are set to 0's for these inputs). After phase 1 and phase 2 training,  $N$  performs correctly on  $T_2$ , but may be incorrect on  $T_1$ , i.e. forget phase 1 training. This happens when on inputs corresponding to category 1 or 2, they output 0, since  $T_2$  always sets  $O_1$  and  $O_2$  to 0. Here, we show that when this is the case, the network has not entirely forgotten phase<sub>1</sub> training. for Relu activation and binary inputs.

**Perceptron.** Here, we consider  $N$  to be a perceptron, i.e., inputs are directly connected to output neurons.

After phase 1, let  $O_1$  be the perceptron with  $g = f + 1$  weights given by  $\vec{W}$  and bias  $b$  with activation RELU, i.e., i.e.,  $O_1(I) = \text{RELU}(\sum_{i \leq f} I_i * w_i)$ . ( $W_g$  is the bias, and the last input is set to 1). So, if  $I$  with label 1 is input, then  $(I \cdot w) > 0$ .

Let phase<sub>2</sub> training involve an input  $J$ , say of label 3, so the desired outputs of neurons  $O_1, O_2, O_3$  and  $O_4$  are 0, 0, 1, 0. Further, let  $O_1$  on input  $J$  output  $D > 0$ , which is a misclassification and the weights of  $O_1$  would be updated to fix this, i.e., make the output be 0. With perceptron learning algorithm or gradient descent, this would mean  $\vec{W}' = \vec{W} - \alpha * \vec{J}$  where  $\alpha$  is the learning rate.

By Lemma 2, the cosine similarity between  $\vec{W}$  and  $\vec{W}'$  is non-negative (and is 0 for just one weight vector). By symmetry arguments, an arbitrary weight vector  $V$  would have an expected cosine similarity of zero, we can conclude that the phase 1 training is not fully forgotten after phase 2 training.

**Multilayer Perceptron (MPL).** Here, we consider  $N$  to be two layers of a perceptron (the argument can be extended to multiple layers) - a hidden layer  $H$  and an output layer  $O$  with 4 output neurons. Let  $U$  be the set of weights from input to hidden layer, i.e.,  $U_{i,j}$  is the weight from  $i^{th}$  input to the  $j^{th}$  hidden neuron. Let  $V$  be the set of weights from hidden to output layer, i.e.,  $V_{i,j}$  is the weight from  $i^{th}$  hidden neuron to the  $j^{th}$  output neuron. Further, let all the activations be Relu. Using standard backpropagation, the weight update for  $V_{i,j}$  is proportional to  $h_i$ , and argument for cosine similarity of  $V$  and updated  $V$  being non-negative is exactly as for the case of the perceptron. For the weights leading to the hidden neuron  $H_j$ , the weight update would be proportional to input  $i$  (for  $U_{i,j}$ ) and also proportional to  $V_{j,1}$  (assuming the setting as before where an error was made on output 1, and only output 1). Since this value is constant for the update over all the weights leading to the hidden neuron  $H_j$ , the argument need not change.

## 2. Analysis of catastrophic forgetting and sleep in toy model.

In this section, we examine the cause of the catastrophic failure and the role of sleep in recovering from the forgetting in toy model. While this example is not intended to model all scenarios of catastrophic forgetting, it provides the intuition and explains how our algorithm prevents catastrophic forgetting.

Let us consider the 3-layer network trained on two categories, each with just one example. Consider 2 binary vectors (Category 1 and Category 2) with some region of overlap. We consider ReLU activation since it was used in the rest of this work. We assume the output to be the neuron with the highest activation in the output layer. Let the network be trained on Category 1 with backpropagation using static learning rate. Following this, we trained the network on Category 2 using same approach. A 3-layer network we consider here has an input layer with 10 neurons, 30 hidden neuron and an output layer with 2 neurons for the 2 categories. Inputs are 10 bits long with 5 bit overlap. We trained with learning rate of 0.1 for 4 epochs.

*Analysis of hidden layer behaviour:* We can divide the hidden neurons into four types based on their activation for the two categories:  $A$  - those neurons that fire for Category 1 but not 2;  $B$  - those neurons that fire for Category 2 but not 1;  $C$  - those neurons that fire for Category 1 and 2;  $D$  - those that fire for neither category, where firing indicates a non-zero activation. Note that these sets may change during training or sleep. Let  $X_i$  be the weights from type  $X$  to output  $i$ .

Consider the case where the input of Category 1 is presented. The only hidden layer neurons that fire are  $A$  and  $C$ . Output neuron 1 will get the net value  $A * A_1 + C * C_1$  and output neuron 2 will get the net value  $A * A_2 + C * C_2$ . For output neuron 1 to fire, we need two conditions to be held: (1)  $A * A_1 + C * C_1 > 0$  (2)  $A * A_1 + C * C_1 > A * A_2 + C * C_2$ . The second condition above can be rewritten as  $A * A_2 - A * A_1 < C * C_1 - C * C_2$ , which separates the weights according to the hidden neurons. Using this separation, we give the following definitions: Define  $a$  to be  $(A_2 - A_1) * A$  on pattern 1;  $b$  to be  $(A_2 - A_1) * A$  on pattern 2;  $p$  to be  $(C_1 - C_2) * C$  on pattern 1 and  $q$  to be  $(C_1 - C_2) * C$  on pattern 2. (Note that  $p$  and  $q$  are very closely correlated since they differ only in the activation values of  $C$  neurons which are positive in both cases).

So, on the input pattern 1, output 1 fires only if  $a < p$ ; on input pattern 2, output 2 fires only if  $q < b$ .

*Catastrophic forgetting:* Following training on 2 categories, if the network can not recall Category 1, i.e., output neuron 1 activation is negative or less than that of output neuron 2, catastrophic forgetting has occurred (We confirmed this occurred 78% of times for the 3 layer network described above and 100 trials). The second phase of training ensures  $q < b$ . This could involve reduction in  $q$  which would reduce  $p$  as well. (Since  $A$  does not fire on input pattern 2, back-propagation does not alter  $a$ ) Reducing  $p$  may result in failing the condition  $a < p$ , i.e., misclassifying input 1.

*Effect of sleep:* Sleep can increase difference among weights (which are different enough to begin with) as was shown in (1, 2). So, as the difference between  $A_2$  and  $A_1$  increases, this decreases  $a$  (as  $A_1$  is higher,  $a = A_2 - A_1$  decreases). Occurrence of the same change to  $p$  is prevented as follows: it is likely that at least one of the weights coming to a  $C$  neuron is negative. In that case, increasing the difference would involve making the negative weight even more negative, resulting in the neuron joining either  $A$  or  $B$  (as it no longer fires for the pattern showing the negative weight), thus reducing  $p$ . (This is explained further in the supplement)

When the neurons in  $C$  remains, we have a more complex case: here,  $a$  decreases, but  $p$  may also decrease correspondingly; another undesirable scenario is when  $b$  decreases to become less than  $q$ . Typically sleep tends to drive synaptic weights of the opposite signs, or the weights of same sign but different by some threshold value, away from each other. There are conditions when the difference between weights is below threshold point to cause divergence. In those cases sleep does not improve performance.

*Experiments:* In our experiments, for majority of the cases, we found  $C$  to be empty after sleep, thus making  $p$  to become 0. For the instances when this was not a case, the initial values of  $A_1$ ,  $A_2$ ,  $B_1$  and  $B_2$  were almost 0, i.e., the entire work of classifying the inputs is done by shared input. In such case, the network has no hidden information that sleep could retrieve.

## 3. Computational Costs of SRC

We can evaluate computational costs of SRC as a combination of (a) number of images passed through the network (both forward and backward passes), and (b) storage costs. We first note that length of sleep is mostly related to the size of the network, not to the size of the training set. Thus, for larger datasets, while more images may be needed during training phase (in the ‘‘awake’’ state) in order for classification accuracy/loss to saturate, during ‘‘sleep’’ this is not necessarily true. Because

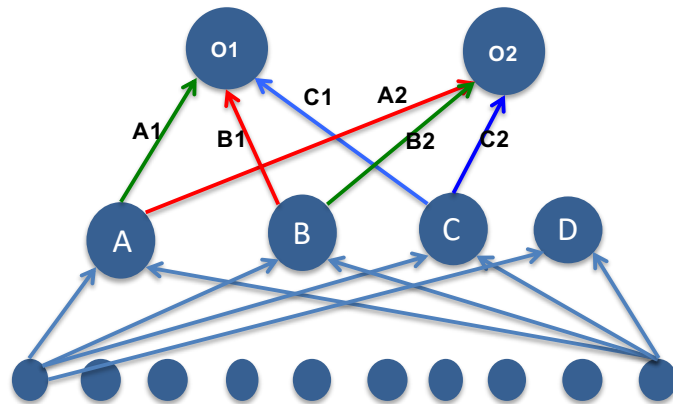

**Good trials (85%, 58 out of 68)**  
**Sleep prevented catastrophic forgetting**

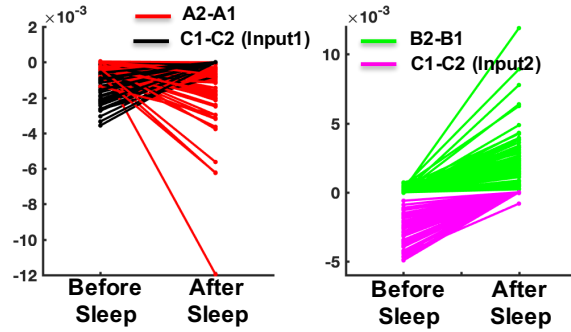

**Bad trials (15%, 10 out of 68)**  
**Sleep resulted no improvement**

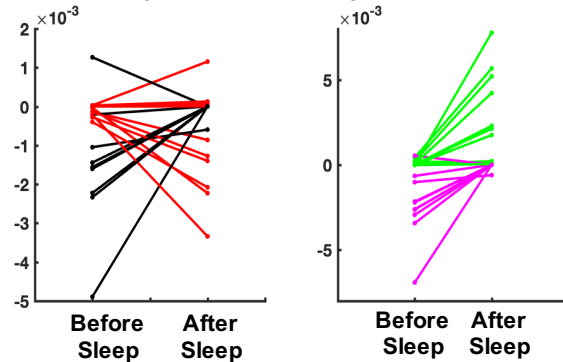

**Supplementary Figure 1.** Example of the binary vector analysis. In the left graph, we show the structure of the network. A - fires only for input 1. B - fires only for input 2. C - fires for both inputs. D - fires for neither input 1 nor input 2. Green arrows represent desirable connections and red arrows indicate incorrect connections. Blue arrows are mixed depending on the input. The equations on the graphs on the right compare the difference between green and red arrows to the difference between blue arrows (for a given input). Depleting the set of C neurons correspond to giving the differences in the inputs more importance.

97 of this, the computational cost of sleep is generally similar for networks trained on Imagenet, CIFAR, MNIST, etc (as long as  
 98 the network size that sleep is applied to is the same, e.g., 2 hidden layers with the same number of units).

99 As for number of iterations of sleep, we have observed that two parameters dictate how much sleep is necessary to recover  
 100 performance on old tasks: the magnitude of weight changes (determines how much to increase/decrease weights when an STDP  
 101 event occurs) and the input firing rate (that is the maximum firing rate for neurons in the first layer during sleep). Parameters  
 102 can be set so that a very small amount of sleep is needed to recover old task performance. In Supplementary Figure 2, one can  
 103 see that as the network learns all 5 MNIST tasks, only 500 iterations (and thus 500 feedforward passes through the network)  
 104 of sleep are needed to reach performance saturation. Each line shows the accuracy as a function of sleep duration on the entire  
 105 dataset (all 5 tasks). Color indicates the sleep phase (e.g., after training task 1, task 2. etc.)

106 If sleep requires 500 iterations to ultimately converge, this is equivalent to presenting 500 “noisy” images. In contrast,  
 107 during training, if we train each class for 2 epochs (as in the case with MNIST), 10,000 images are presented twice, i.e., 20,000  
 108 images fed through the network both forwards and backwards for a total of 40,000 passes. SGD is efficient so we do this in  
 109 batches and we should divide the total number of passes (feedforward + backward) by the batchsize (100). This means the  
 110 training computational time is  $40,000/100 = 400$  passes. This is on the same level as what is required during sleep (400-500  
 111 passes till convergence). The computational performance of sleep phase can be further improved (e.g., by incorporating the  
 112 idea of mini-batches, etc.), just as how gradient descent has been heavily optimized.

113 Lastly, in terms of memory constraints, there are scenarios where SRC reduces storage requirements (as shown with iCaRL)  
 114 and scenarios where SRC requires more memory (as compared to regularization methods). However, regularization methods  
 115 may be more computationally intensive, as they require computation of complex matrices, e.g. Fisher information matrix in  
 116 EWC, or orthogonal projectors in OWM.

#### 117 4. Effect of Input Type during Sleep

118 To evaluate the importance of using task averaged input during sleep, we tested SRC for incremental MNIST task with different  
 119 types of inputs presented during sleep - random input, average input, specific inputs, each presented in 2 conditions (mask/no  
 120 mask). For random inputs, we build a random uniform vector with the same size as the input space to determine input firing

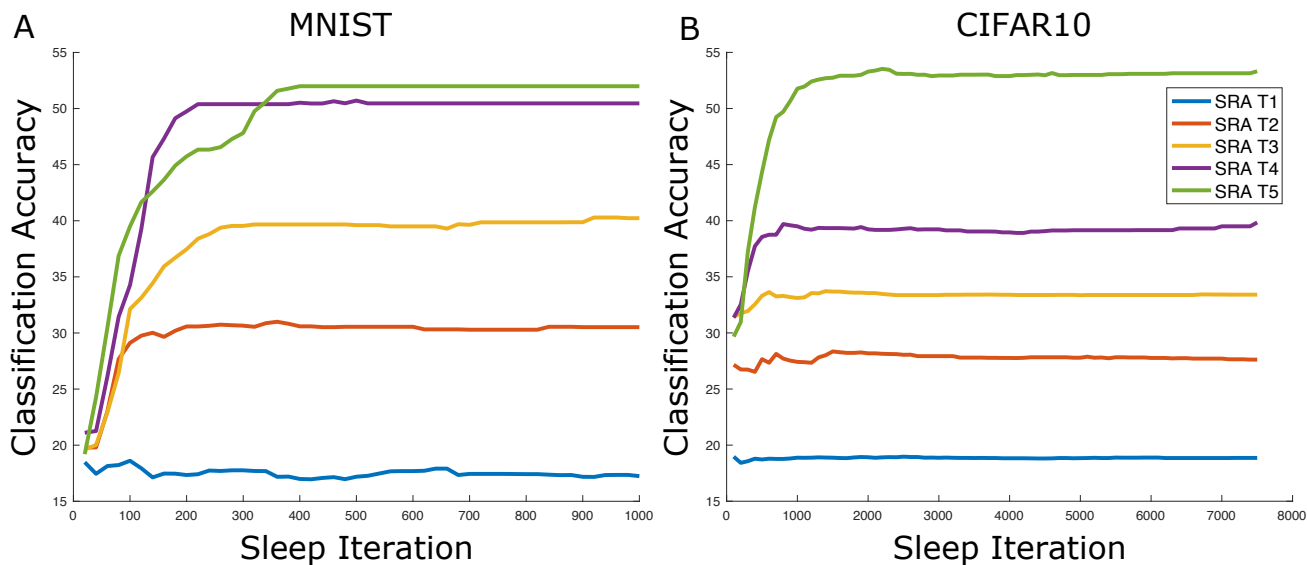

**Supplementary Figure 2.** Accuracy as a function of sleep iteration for MNIST (left) and CIFAR10 (right) datasets. Each line represents the application of SRC after a specific training phase (e.g., after training T1, T2, etc).

121 rates of neurons during sleep. For average input, the same input as described in the main paper is used, i.e., the average of all  
 122 inputs seen so far determines the input firing rates. For specific inputs, we present Poisson distributed spike trains based on  
 123 specific images (e.g., an image of a 3) during sleep. In the mask condition, during each iteration of sleep we randomly select  
 124 a 10x10 portion of the input to present during sleep. In the no mask condition, the entire 28x28 vector is used to compute  
 firing rates. Supplementary Figure 3 shows the classification accuracy for each type of input. For specific inputs classification

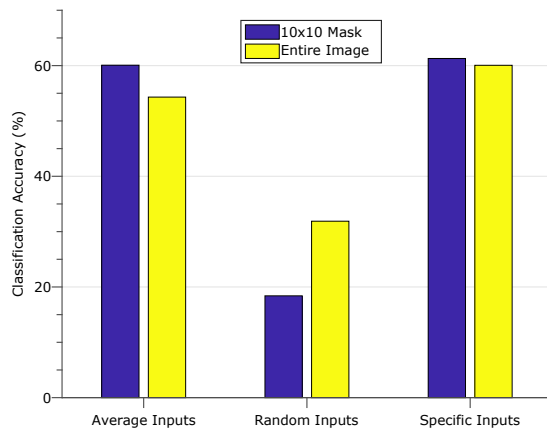

**Supplementary Figure 3.** Classification accuracy on class-incremental MNIST task with different types of inputs (average, random, specific) with 2 conditions (mask/no mask).

125 accuracy reaches 60% in both the mask and no mask condition. For average inputs, we see a 10% degradation when the entire  
 126 image is presented (compared to specific inputs). However, with the mask condition, the degradation between moving from  
 127 specific to average inputs is much smaller. Finally, looking at random inputs, we observe that when the entire random image  
 128 is presented, the network is still able to mitigate catastrophic forgetting (task performance is 30%). However, performance  
 129 is much worse with random inputs, suggesting that task-specific information must be present for the network to optimally recover  
 130 older tasks.  
 131

## 132 5. Effect of Task Training Length

133 Our results suggest that the information about old tasks is not lost in the network after new task training, even if from  
 134 a classification standpoint the old tasks are not classified correctly. One can expect, however, that as a new task training  
 135 increases, the network may eventually lose all the old task information. In order to verify this, we measured the classification  
 136 accuracy before and after sleep in the simplified two task incremental setting for MNIST, Fashion MNIST, CIFAR10, and  
 137 the crossmodal MNIST task. For MNIST, Fashion MNIST, and CIFAR10, task 1 is the first two classes in the dataset and task 2  
 138 is the next two classes. For crossmodal MNIST, task 1 is the entire MNIST task, and task 2 is the entire Fashion MNIST task.

139 We varied the length of training of task 2 in order to test the hypothesis that longer task 2 training would result in an inability  
 140 for task 1 to be recovered after sleep since there is less information in the network pertaining to task 1.

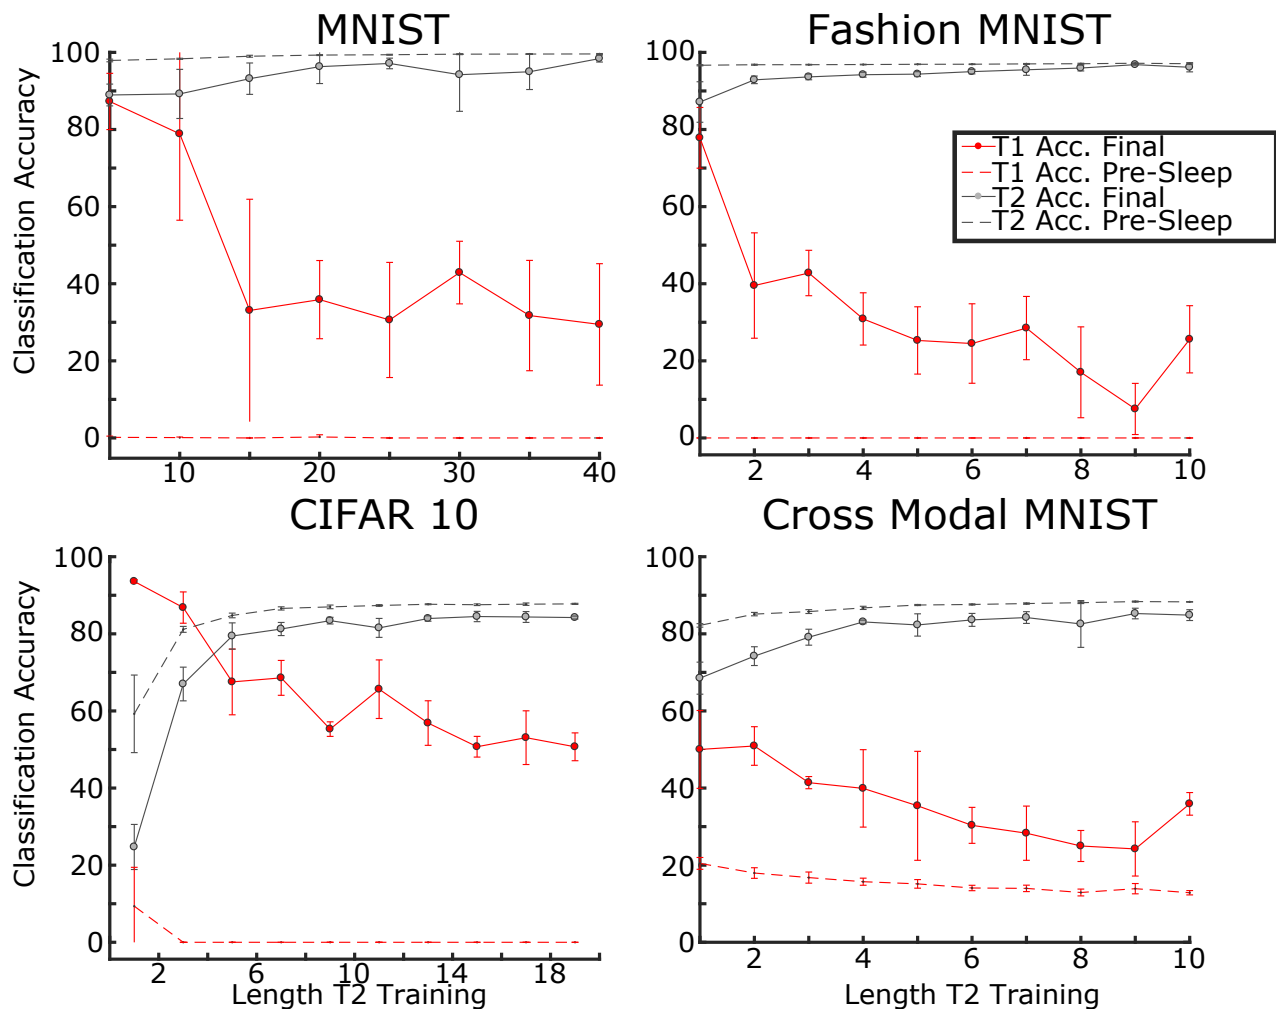

**Supplementary Figure 4.** Classification accuracy as a function of length of task 2 training (in epochs) for 2 task MNIST, Fashion MNIST, and CIFAR 10 as well as the Cross Modal MNIST task. Solid red - T1 accuracy after sleep, dashed red - T1 accuracy before sleep (after T2 training), dashed gray - T2 accuracy before sleep (after T2 training), and solid gray - T2 accuracy after sleep.

141 Supplementary Figure 4 shows classification accuracy on task 1 and task 2 before and after sleep, for all 4 datasets as a  
 142 function of the length of task 2 training (in epochs). In all cases, T1 is mostly forgotten after T2 training (red dashed line),  
 143 except in the case of Cross Modal MNIST, where T1 accuracy is around 20%. With light task 2 training, task 1 classification  
 144 accuracy is recovered significantly. However, as we increase the length of task 2 training, task 1 recovery decreases. Nevertheless,  
 145 it never becomes completely forgotten after sleep (solid red line is always above dashed red). Note that the reverse is true for  
 146 T2. For light T2 training, T2 becomes more degraded after sleep. With longer T2 training, T2 performance remains unchanged  
 147 after sleep (dashed gray line = solid gray line).

148 These results also suggest that possibly effective training strategy would be to interleave multiple episodes of new task  
 149 training and sleep. Indeed, this would well match biology, when new procedural task training in human brain happens slowly  
 150 and involves multiple training sessions and multiple episodes of sleep between them.

## 151 6. Effect of SRC on Single Task Performance

152 From neuroscience standpoint the best studied effect of sleep on memory is an improvement of a single task performance  
 153 after sleep. E.g., in experiments with new skill learning, comparing task performance following episode of training + sleep  
 154 vs. training with no sleep reveals memory improvement when sleep is included. In fact, recent studies revealed an inverse  
 155 association between learning performance and gains in procedural skill, i.e., good learners exhibited smaller performance gains  
 156 after sleep than poor learners (3).

157 To test if SRC can provide similar performance benefits for a single task learning and also show similar dependence on

158 pre-sleep performance, we used the entire MNIST dataset and trained it in 4 conditions, that were different by the length of  
 159 training. SRC was implemented after training in all 4 cases and we compared performance before vs. after sleep.

160 Supplementary Figure 5 shows the classification accuracy on the entire MNIST dataset before/after sleep in 4 training  
 161 conditions. When training is short, i.e., pre-sleep performance is low, we found a very significant 20 percentage point increase  
 162 in classification accuracy after SRC. When training is long, i.e., pre-sleep performance is high, we see a 5 percentage point  
 163 improvement. Finally, for very long training, we observed small reduction in performance after SRC. The last may be related  
 164 to the reported SRC role in increasing generalization (4). Indeed, requirements for robustness/generalization and classification  
 165 accuracy are conflicting, so increase in generalization may explain observed reduction of accuracy after SRC even on recent  
 166 tasks. These results suggest that replay during SRC can indeed capture some important elements of replay in the biological  
 brain.

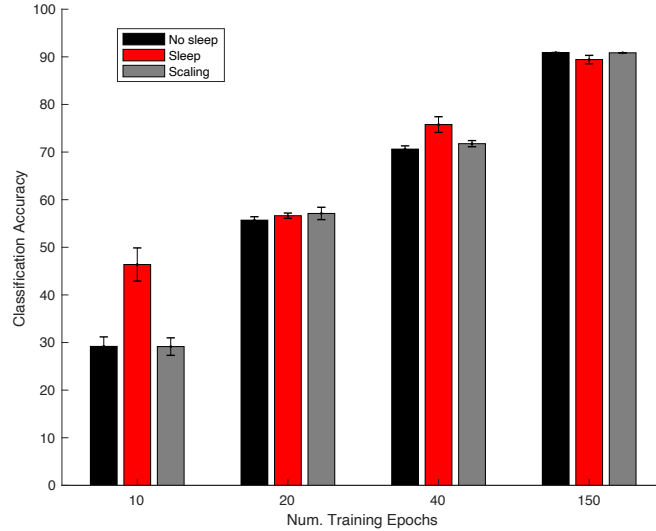

167 **Supplementary Figure 5.** Classification accuracy on the MNIST dataset before (black) and after (red) sleep when trained for 10, 20, or 40, 150 epochs. Scaling of top 2.5% of weights by 1% shown in grey.

167

## 168 7. Implementation of Other Methods

**Elastic Weight Consolidation.** Elastic weight consolidation (5) seeks to reduce the plasticity of weights that are deemed important for previously learned tasks, while utilizing less important weights to learn and represent the new task. Any updates to weights deemed important for previously learned tasks are penalized in the loss function, thus making it harder for any new training to impact the performance of old tasks. More formally, this is written as a regularization term added onto the loss function

$$L(\theta) = L_B(\theta) + \sum_i \frac{\lambda}{2} F_i(\theta_i - \theta_{A,i}^*).$$

169 Here  $L_B(\theta)$  represents the normal loss function evaluated on the new training set  $B$ . The regularization term computes the  
 170 product of the Fisher information matrix of parameter  $i$  with the difference between the proposed weight update  $\theta_i$  and  
 171 the original parameter when trained on an earlier dataset  $\theta_{A,i}$ . In this way, weight updates to parameters deemed important for  
 172 task  $A$  are penalized. The  $\lambda$  parameter determines how plastic the network should be. A high value for  $\lambda$  suggests that weight  
 173 updates should only occur when they are vital to achieving a high performance on the new task  $B$ . For our purposes, we  
 174 performed a parameter sweep over  $\lambda$  to find the best value of  $\lambda$  for each specific task.

175 In this work, we implemented elastic weight consolidation (EWC) as a benchmark to compare against the sleep replay  
 176 algorithm. In the original work (5), EWC was tested on the MNIST permutation task as well as a series of reinforcement  
 177 learning games. In other works, it has been noted that EWC does not achieve optimal results on incremental learning tasks  
 178 (when the classes in the dataset are learned incrementally) (6, 7). In this work, we corroborate these results. Mainly, EWC fails  
 179 to perform continual learning on the incremental learning tasks. However, on the Multi-modal MNIST task where the network  
 180 must learn both the Fashion MNIST and MNIST datasets, EWC outperforms SRC. These results suggests that different  
 181 methods can excel in certain areas of continual learning but fail in others and that combinations of different methods may  
 182 provide an optimal solution that can be explored in future studies.

**Synaptic Intelligence.** The Synaptic Intelligence approach (SI) (8) is similar to EWC with a slightly different regularization term. To penalize updates to important parameters, the SI method uses the following loss function:

$$L'_\mu = L_\mu + c \sum_i \Omega_i^\mu (\theta'_i - \theta_i)^2.$$

183 This regularization term is similar to EWC, where  $\Omega_i^u$  keeps track of how important an individual parameter  $\theta_i$  is to previously  
 184 learned tasks. The parameter  $c$  is similar to the  $\lambda$  parameter in EWC. We performed a parameter search over  $c$  to find the best  
 185 value for each of the tasks tested in the paper. Given the similarities of the two approaches, we observed similar performances  
 186 on the tasks tested in the paper between EWC and SI. Mostly, SI fails to perform class incremental learning but performs well  
 187 on the Multi-modal MNIST task.

188 **Orthogonal Weight Modification.** The orthogonal weight modification (OWM) approach (9) takes a different approach by trying  
 189 to force weight updates in a direction that is orthogonal to the subspace spanned by all previously learned inputs. First, a  
 190 projector  $P$  is constructed to find the direction orthogonal to the input space:  $P = I - A(A^T A + \alpha I)^{-1} A$ , where  $A$  consists  
 191 of all previously trained inputs as columns. Weight modifications are then done by  $\Delta W = \kappa P \Delta W^{BP}$ . We used  $\alpha$  values of  
 192  $0.9 * (0.001^l)$ ,  $0.1^l$ , and  $0.6$  in each of the 3 hidden layers. Here,  $l$  represents the progress made through the training of the  
 193 current task. For CIFAR-10, we used  $0.9 * (0.0001^l)$ ,  $0.1^l$ , and  $0.006$  as the  $\alpha$  parameters. The authors in the original paper use  
 194 an iterative method to construct  $P$  so not all inputs must remain stored. In the tasks tested in the paper, OWM performs  
 195 significantly better than the other two regularization methods: EWC and SI.

196 Additional analyses revealed that OWM may take longer to converge than standard methods. An ideal ANN may converge  
 197 on MNIST after around 2 epochs/task. However, this was not true for OWM. Table 1 in the manuscript shows OWM  
 198 performance when trained with 10 epochs/task (the same as for all other methods) on MNIST, Fashion MNIST and CIFAR10.  
 199 We chose this training time as it was sufficient to converge for all the methods, including those with slow convergence rate. In  
 200 Supplementary Figure 6, we present data over a range of training duration for OWM. The results with longer training are in  
 201 line with other implementations of OWM except for the case of CIFAR-10 (9, 10). We hypothesize that this disparity occurs  
 202 because our study only applies OWM to the fully connected layers, not in an end-to-end fashion, as done in (9). Since our  
 203 extracted features for CIFAR10 images were based on Tiny Imagenet, they are likely not maximally informative. If we use  
 204 extracted features from a network trained on CIFAR10 instead of Tiny Imagenet, we could improve OWM performance on  
 205 CIFAR10 (when trained sequentially) from 34% to 42%. This suggests that OWM may work better in scenarios where the  
 206 feature extractor can also be fine-tuned on the dataset.

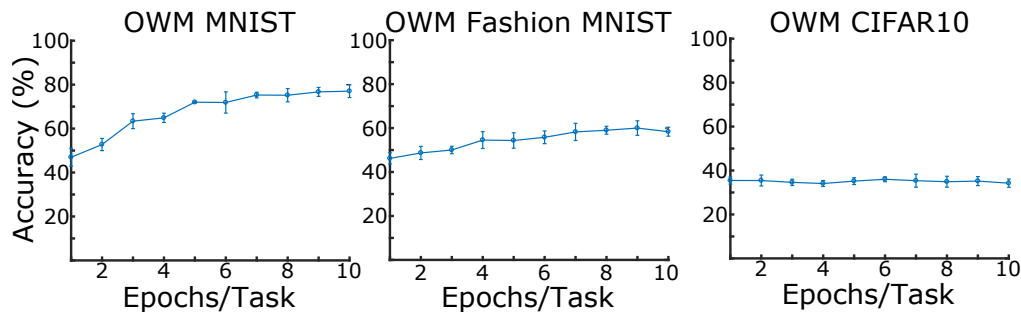

Supplementary Figure 6. Analysis of OWM performance as a function of number of epochs per task on MNIST (left), Fashion MNIST (middle) and CIFAR10 (right) datasets.

207 **Discussion of Regularization Approaches.** Table 1 in the main paper illustrates that the first two regularization (SI and EWC)  
 208 approaches fail to prevent catastrophic forgetting in the incremental tasks. However, on the Multi-modal MNIST task, these  
 209 regularization approaches come close to reaching the ideal accuracy. Here, we briefly discuss why these methods may succeed  
 210 in some domains and fail in others. In the paper outlining EWC, the authors tested the algorithm on the MNIST permutation  
 211 task and reinforcement learning tasks (5). For SI, the algorithm was tested on the MNIST permutation task as well as the split  
 212 MNIST and CIFAR tasks (8).

213 The MNIST permutation task defines a single task as one representation of the input space. During subsequent tasks, this  
 214 representation is permuted (so that pixel  $i$  of all images now appears in a new location in the image). During incremental  
 215 learning, the network must be able to distinguish all 10 digits in previously learned permutations, while also learning the  
 216 newest permutation. Since a lot of the information in MNIST images is present in the center of the image, we hypothesize that  
 217 when a new permutation of the images is created, the pertinent information is likely moved to distinct regions of the image.  
 218 These regions have a relatively small amount of overlap with the old permutations, so when EWC or SI are applied, important  
 219 weights connecting from the center of the image may be preserved, while the weights that connect from the new important  
 220 regions of the image are updated.

221 For split MNIST/CIFAR tasks, the classes in the dataset are divided into subsets (i.e. pairs of digits or images), and the  
 222 network learns to distinguish each image in the pair. During task 1, the network may learn to distinguish 0 and 1. Then,  
 223 during task 2, the network may learn to distinguish 2 and 3, utilizing the same two output neurons as were used for task 1. In  
 224 this scenario, regularization approaches may work well by allocating distinct pathways through the network for each binary  
 225 classification task learned. Thus, when task 2 is learned, old pathway through the network is preserved for task 1, and a new  
 226 pathway is created to represent task 2. In incremental learning settings, activity to certain output neurons is cut off during  
 227 new task training, as is the case with the incremental tasks tested in the paper. Thus, when training on a new task (e.g., digits  
 228 2 and 3), output neurons representing old memories (e.g., digits 0 and 1) should not receive any activity to achieve a suitable

loss on the new task. We hypothesize that the regularization term added by EWC and SI is insufficient to maintain activity to these output neurons representing older classes.

Nevertheless, we found that EWC and SI work well for the multi-modal MNIST task (where the network must learn MNIST and Fashion MNIST incrementally). In this task, during both phases of learning, all output neurons remain active. Additionally, the MNIST and Fashion MNIST datasets may maintain information in distinct parts of the image. Therefore, regularization approaches may consolidate the two tasks into the network, solely by preserving weights that are significantly important for the old task and using the relatively less important weights to represent the new task.

**Incremental Classifier and Representation Learning (iCaRL).** Here, we describe our implementation of the iCaRL method and differences with the original paper (11). The main idea of the iCaRL algorithm is to utilize a fixed memory capacity (capacity  $K$ , where  $K$  represents number of examples stored from previous classes) in an efficient way to prevent catastrophic forgetting. Specifically, it selects which  $K$  examples to store from previous classes ( $m = \frac{K}{t}$  images per class, where  $t$  is the number of classes seen so far) by adding examples to the memory bank which cause the average feature vector over all exemplars ( $m$  images in the memory bank) to approximate the average feature vector over all training examples (all images of the relevant class). These images are sorted in the exemplar set based on how well they approximate the average feature vector over all training examples. When a new class is learned, the exemplar set for a certain class is reduced (now  $m = \frac{K}{t+1}$ ) by removing the least informative (of the average feature vector) examples.

In addition to introducing an efficient exemplar management, the learning rule and classification scheme are modified in the original iCaRL implementation (11). Specifically, the learning rule incorporates both soft-target distillation over examples from previous tasks as well as cross-entropy loss from the newest task. The labels for the new images are binary one-hot encoded vectors with the correct classifications. However, the labels for the old images are computed by passing these images through the network and storing the output from the network. In addition, the classification scheme is changed to use the Nearest Means of Exemplar classification strategy, where test inputs are fed through the network and their representation in the last hidden layer (before the classification layer) is used to compute the classification for that test example. Its label is determined by finding the nearest-class-mean using the exemplar set and all class labels which have been learned so far. In our implementation of iCaRL, we used the Nearest Means of Exemplar classifier as well as soft-target distillation.

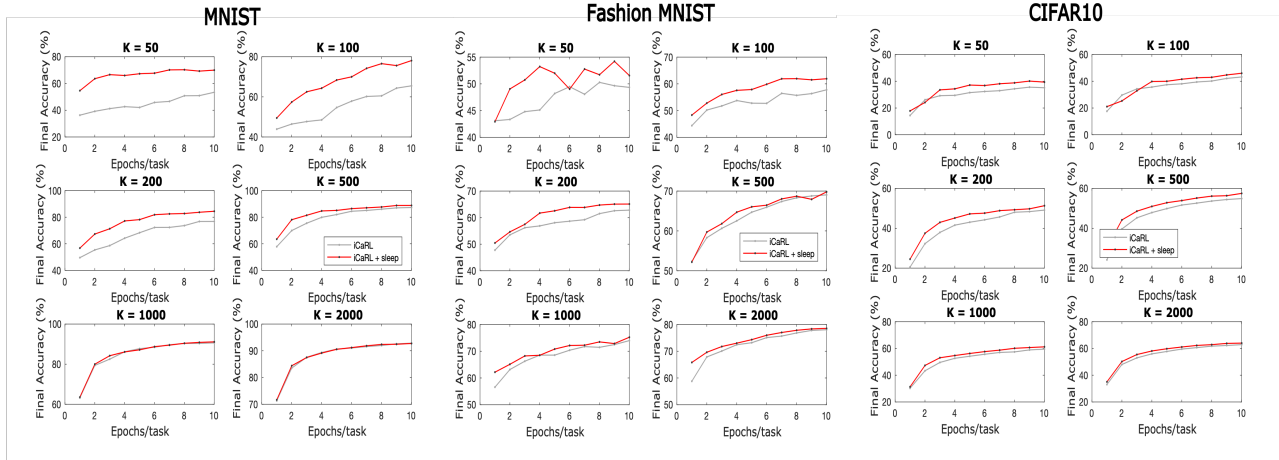

**Supplementary Figure 7.** Analysis of iCaRL performance with (red) and without (gray) SRC as a function of number of epochs per task on MNIST (left), Fashion MNIST (middle) and CIFAR10 (right) datasets.

As with OWM, we found that iCaRL can benefit from longer training times (see Supplementary Figure 7). We, however, showed that even with longer training times, SRC can still improve upon iCaRL performance, especially for lower values of  $K$ . Furthermore, SRC can reduce the training time needed to achieve maximal performance of iCaRL (Supplementary Figure 7). We characterize the savings in the training time by the difference in epochs/task when iCaRL + SRC achieves the same accuracy as iCaRL alone after 10 training epochs. These results are reported in the main manuscript.

## 8. Implementation of both Training and Sleep Replay within SNN

Sleep replay algorithm presented in this study was implemented for artificial neural networks. In addition, we tested another implementation when both training and sleep were implemented using spiking neural networks (SNNs). SNNs recently received attention from the neuromorphic hardware community for their ability to perform power-efficient computing (12), particularly during inference phase (13–15). However, SNNs are still inferior to ANNs on complex data training (16). Nevertheless, the question is raised of whether or not the entire wake-sleep pipeline could be performed within a spiking network architecture as well as what implications this may have for neuroscience and computer science.

To address this question, we implemented both awake training and sleep replay within SNN architecture. We performed "awake" sequential training on MNIST data in an SNN via backpropagation (17). This method works by approximating the



268 discontinuity in a neuron’s non-linear spiking function so as to make it differentiable when performing backpropagation. Our  
269 goals were (a) to verify that catastrophic forgetting occurs in an SNN trained through backpropagation; (b) to test the effect of  
270 SRC in overcoming catastrophic forgetting.

| Phase             | T1 performance | T2 performance |
|-------------------|----------------|----------------|
| T1 awake training | 99.6           | 0.6            |
| Sleep             | 84.8           | 2.9            |
| T2 awake training | 0              | 85.9           |
| Sleep             | 71.8           | 51.3           |

**Supplementary Table 1. Catastrophic forgetting is observed when sequential training is performed in an SNN architecture. SRC is able to produce more balanced classification accuracy on both tasks (T1 = digits 0-1, T2 = digits 2-3 in MNIST dataset). Each value represents the average of 5 trials.**

271 Supplementary Table 1 illustrates the classification accuracy for two task incremental training on the MNIST dataset (T1 =  
272 digits 0-1, T2 = digits 2-3). The SNN trained here had the same number of neurons in each layer as the ANNs used in the  
273 main paper (2 hidden layers with 1200 neurons each). After training on T1, SNN was able to classify images in T1 with 99%  
274 classification accuracy (averaged over 5 trials). After training on T2, catastrophic forgetting occurred, as classification accuracy  
275 on T1 dropped to 0%. This illustrates that catastrophic forgetting is not unique to ANNs but can occur in SNNs due to the  
276 interference between the tasks. (Indeed, our recent studies suggest that catastrophic forgetting can occur in a spiking network  
277 even with biologically realistic local learning rules (18, 19) when tasks with a high amount of overlap are learned incrementally.)  
278 After sleep, performance on T1 was mostly recovered while performance on T2 was partially reduced. Overall, this experiment  
279 demonstrates that catastrophic forgetting does occur in SNNs and sleep can reduce the impact of catastrophic interference.

## 280 9. Analysis of Sleep Replay

281 To evaluate replay of the old and new tasks during sleep, we compared the neurons that spiked frequently during sleep with  
282 the average activation in the ANN for each specific image (Supplementary Figure 8). When an image was presented to the  
283 ANN (before SRC is applied), we recorded the activation vectors in each hidden layer  $a_{1,i_j}, a_{2,i_j}$  for hidden layers 1 and 2,  
284 respectively, for each image  $i$  of class  $j$ . For two tasks, we recorded values for  $a_{1,i_0}$  through  $a_{1,i_3}$  and  $a_{2,i_0}$  through  $a_{2,i_3}$   
285 to store activation vectors for each class of digits learned, 0 through 3. Then, we tested for the overlap between neurons that  
286 had non-zero activation values in ANN (before SRC) for a specific input and neurons which had non-zero firing rates during  
287 subsequent sleep (during SRC). This serves as a proxy to measure the extent to which a specific input is replayed during sleep.  
288 As a control group, we performed the same calculations but using ANN activation vectors obtained in response to an image  
289 created with uniformly-distributed random noise.

290 Supplementary Figure 8A shows the average amount of reactivation for each digit in each hidden layer, normalized by  
291 the reactivation of the control group. In layer 1, for each digit, we observed reactivation values that were greater than  
292 reactivation for a random input. Most notably, digit 1 (from the old task) seems to be reactivated the most, followed by digits  
293 2 and 0. Analysing the confusion matrices before and after sleep for this specific network (Fig 8B), we observed that the  
294 classification accuracy for digit 1 was particularly improved after sleep, and when a network predicted an image incorrectly, it  
295 often misclassified it as digit 1. This suggests that the digit-specific reactivation correlates well with the network classification  
296 performance and further steps to improve reactivation during sleep may lead to further SRC performance improvements. In  
297 Layer 2 (Fig 8A, right), we observed that all digits were reactivated greater than expected for a random input image. However,  
298 the ratio of reactivation for each digit was about equal. Overall, these results suggest that previously learned tasks are replayed  
299 during sleep phase and amount of replay positively correlates with classification performance on the old digits that otherwise  
300 would have been forgotten.

301 In addition to reactivation, we also measured the effect of sleep replay on the representation of distinct digits in the network.  
302 Work by (20) shows that during training, representations of distinct image classes can become more dissimilar and sparser. We  
303 perform a similar analysis here by plotting the activation of a group of 40 randomly selected neurons before and after sleep,  
304 when presented with each of the 10 MNIST digits (Fig 9). Before sleep, the representation of all digits is very similar (with the  
305 exception of digits 8 and 9, which were more recently learned). After sleep, every digit has a unique representational code,  
306 along with much sparser activity.

## 307 Supplementary References

- 308 1. Y Wei, GP Krishnan, M Bazhenov, Synaptic mechanisms of memory consolidation during sleep slow oscillations. *J. Neurosci.* **36**, 4231–4247 (2016).
- 309 2. OC González, Y Sokolov, G Krishnan, M Bazhenov, Can sleep protect memories from catastrophic forgetting? *BioRxiv*, 569038 (2019).
- 310 3. FH Rångtjell, et al., Learning performance is linked to procedural memory consolidation across both sleep and wakefulness. *Sci. reports* **7**, 1–8 (2017).
- 311 4. T Tadros, G Krishnan, R Ramyaa, M Bazhenov, Biologically inspired sleep algorithm for increased generalization and adversarial robustness in deep neural networks in *International Conference on Learning Representations*. (2019).
- 312 5. J Kirkpatrick, et al., Overcoming catastrophic forgetting in neural networks. *Proc. national academy sciences* **114**, 3521–3526 (2017).
- 313 6. GM van de Ven, AS Tolias, Generative replay with feedback connections as a general strategy for continual learning. *arXiv preprint arXiv:1809.10635* (2018).
- 314 7. GM van de Ven, HT Siegelmann, AS Tolias, Brain-inspired replay for continual learning with artificial neural networks. *Nat. communications* **11**, 1–14 (2020).
- 315 8. F Zenke, B Poole, S Ganguli, Continual learning through synaptic intelligence in *Proceedings of the 34th International Conference on Machine Learning-Volume 70*. (JMLR. org), pp. 3987–3995 (2017).
- 316 9. G Zeng, Y Chen, B Cui, S Yu, Continual learning of context-dependent processing in neural networks. *Nat. Mach. Intell.* **1**, 364–372 (2019).
- 317 10. TC Kao, K Jensen, G van de Ven, A Bernacchia, G Hennequin, Natural continual learning: success is a journey, not (just) a destination. *Adv. Neural Inf. Process. Syst.* **34** (2021).
- 318

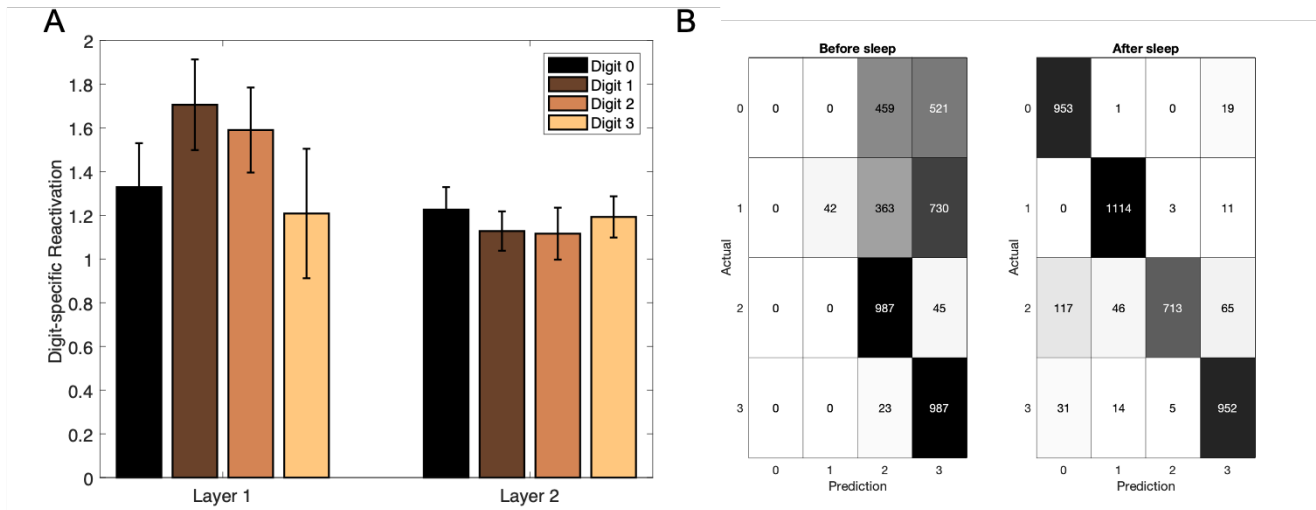

**Supplementary Figure 8.** During sleep, digit-specific activations are replayed more often than would be expected by chance. A) Digit-specific reactivation in layer 1 (left) and layer 2 (right) for each digit. Each value is normalized by a control group so values greater than 1 indicate there is more reactivation than would be expected for a randomly generated image. B) Confusion matrices before (left) and after (right) sleep for the two tasks.

319 11. SA Rebuffi, A Kolesnikov, G Sperl, CH Lampert, icarl: Incremental classifier and representation learning in *Proceedings of the IEEE conference on Computer Vision and Pattern Recognition*. pp.  
320 2001–2010 (2017).  
321 12. S Ghosh-Dastidar, H Adeli, Spiking neural networks. *Int. journal neural systems* **19**, 295–308 (2009).  
322 13. PU Diehl, et al., Fast-classifying, high-accuracy spiking deep networks through weight and threshold balancing in *2015 International joint conference on neural networks (IJCNN)*. (IEEE), pp. 1–8  
323 (2015).  
324 14. L Zhang, S Zhou, T Zhi, Z Du, Y Chen, Tdsnn: From deep neural networks to deep spike neural networks with temporal-coding in *Proceedings of the AAAI Conference on Artificial Intelligence*. Vol. 33,  
325 pp. 1319–1326 (2019).  
326 15. S Davidson, SB Furber, Comparison of artificial and spiking neural networks on digital hardware. *Front. Neurosci.* **15** (2021).  
327 16. Y Wu, et al., Direct training for spiking neural networks: Faster, larger, better in *Proceedings of the AAAI Conference on Artificial Intelligence*. Vol. 33, pp. 1311–1318 (2019).  
328 17. A Yanguas-Gil, Coarse scale representation of spiking neural networks: backpropagation through spikes and application to neuromorphic hardware in *International Conference on Neuromorphic*  
329 *Systems 2020*. pp. 1–7 (2020).  
330 18. OC González, Y Sokolov, GP Krishnan, JE Delanois, M Bazhenov, Can sleep protect memories from catastrophic forgetting? *Elife* **9**, e51005 (2020).  
331 19. R Golden, JE Delanois, P Sanda, M Bazhenov, Sleep prevents catastrophic forgetting in spiking neural networks by forming joint synaptic weight representations. *bioRxiv*, 688622 (2020).  
332 20. JL McClelland, BL McNaughton, RC O'Reilly, Why there are complementary learning systems in the hippocampus and neocortex: insights from the successes and failures of connectionist models of  
333 learning and memory. *Psychol. review* **102**, 419 (1995).

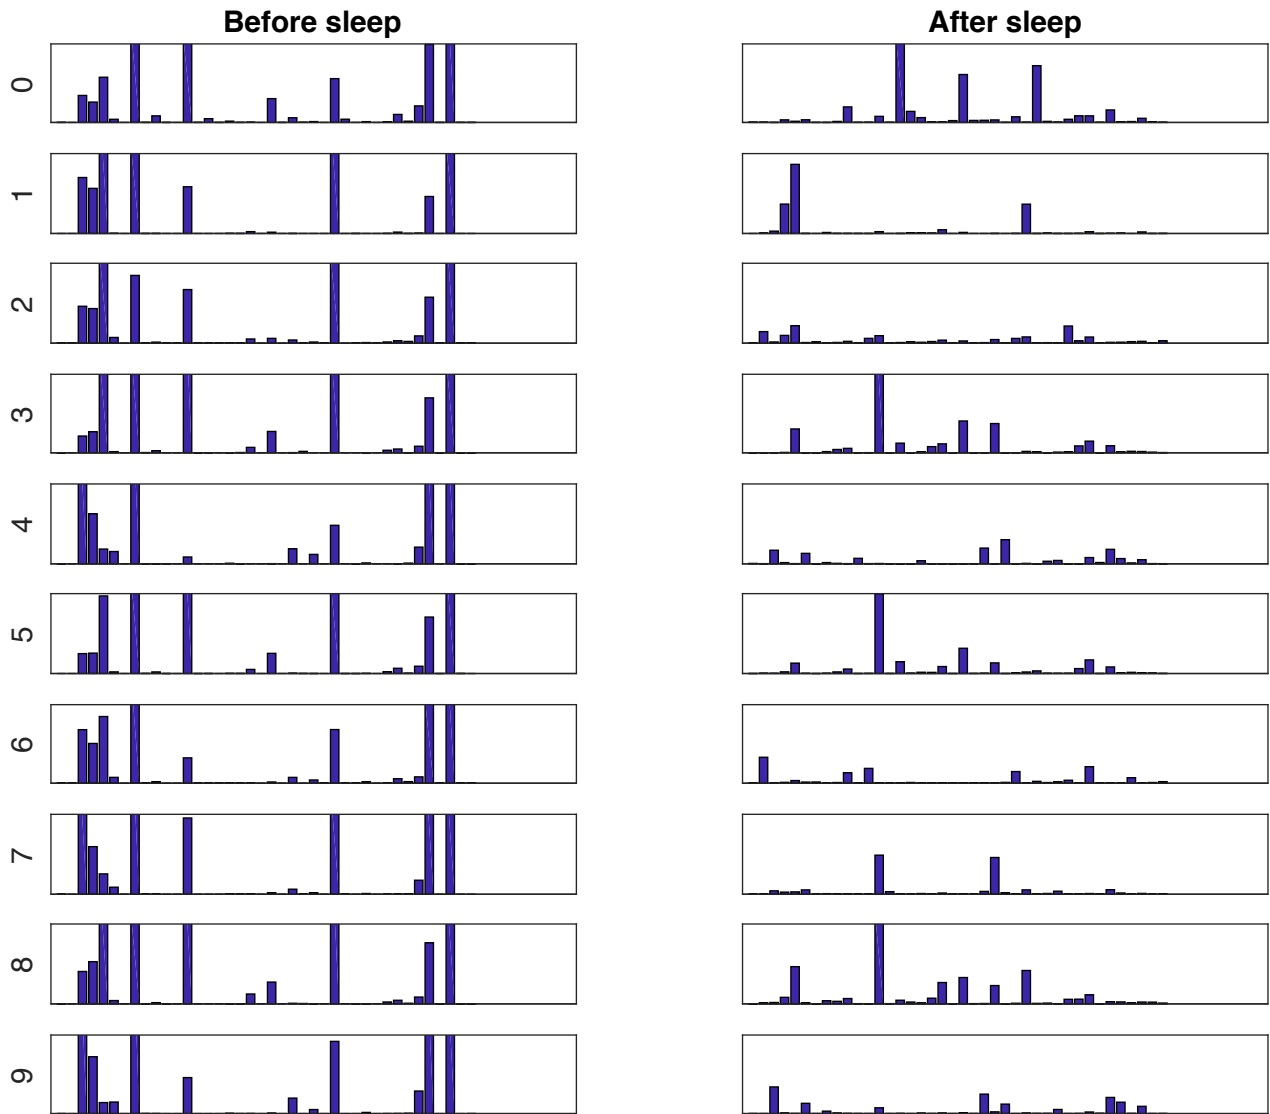

**Supplementary Figure 9.** Average activation of 40 randomly selected neurons before (left) and after sleep (right) when presented with digits from each class. Overall, less neurons respond to each digit suggesting a sparser representation.
